# Supplementary material for: Evaluation of chloroplast genome annotation tools and application to analysis of the evolution of coffee species
Source: PLoS One. 2019 Jun 12;14(6):e0216347. doi: 10.1371/journal.pone.0216347 (PMC6561552; doi:10.1371/journal.pone.0216347)
Supplement: S1 Table — Additional samples to those used in Hamon et al. (2017) are marked by an asterik. (XLSX) [file pone.0216347.s001.xlsx]

## Sheet: S1 Table 
S1 Table : Liste of species used for Coffea nuclear phylogeny. Additional samples to those used in Hamon et al. (2017) are marked by an asterik.
Species name	Voucher/herbarium code1	Country of origin	Source of DNA sample2
Coffea
C. andrambovatensis J.-F.Leroy	A.310 (K, P, TEF)	Madagascar (east)	KCRS
C. abbayesii J.-F.Leroy	A.601 (K, P, TAN)	Madagascar (east)	KCRS
C. ambodirianensis Portères	A.572 (K, P, TEF)	Madagascar (east)	KCRS
C. ankaranensis A.P.Davis & Rakotonas.	A.525 (K, P, TAN)	Madagascar (north)	KCRS
C. anthonyi Stoff. & F.Anthony	OD72 (K)	Cameroon	BRC
C. arenesiana J.-F.Leroy	A.403 (K, P)	Madagascar (east)	KCRS
C. augagneuri Dubard	A.966 (TEF)	Madagascar (east)	KCRS
C. bernardiniana J.-F.Leroy	BM16-21	Mascarene Islands (Mauritius)	BRC
C. bertrandii A.Chev.	A.5 (K, P, TAN)	Madagascar (south east)	KCRS
C. boiviniana (Baill.)Drake	A.980 (K, P)	Madagascar (north)	KCRS
C. bonnieriDubard	A.535 (K, MO, P)	Madagascar (north)	KCRS
C. brevipesHiern	JA54 (K)	Cameroon	BRC
C. canephoraA.Froehner	BC53 (K)	Central African Republic	BRC
C. charrieriana Stoff. & F.Anthony	OA22 (BR)	Cameroon	BRC
C. congensisA.Froehner	CB65 (K)	Cameroon	BRC
C. costatifructa Bridson	OH54 (K)	Tanzania (low altitude)	BRC
C. costei sp. nov. ined.	A.956 (K, P, TAN, TEF)	Madagascar (north)	KCRS
C. coursiana J.-F.Leroy	A.570 (K, TAN, TEF)	Madagascar (east)	KCRS
C. dolichophylla J.-F.Leroy	A.206 (K, P, TEF)	Madagascar (east)	KCRS
C. dubardii Jum.	A.969 (K, P, TAN)	Madagascar (north)	KCRS
C. eugenioides S.Moore	DA75 (D) *	Kenya (high altitude)	BRC
C. eugenioides S.Moore	A.16 (D)	Kenya (high altitude)	KCRS
C. eugenioides S.Moore	DA (K) *	Kenya (high altitude)	BRC
C. farafanganensis J.-F.Leroy	A.208 (P, TEF)	Madagascar (east)	KCRS
C. heimii J.-F.Leroy	A.516 (K, TEF)	Madagascar (north)	KCRS
C. heterocalyx Stoff.	JC 62 (K)	Democratic Republic of Congo	BRC
C. homollei J.-F.Leroy	A.945 (K, P, TEF)	Madagascar (east)	KCRS
C. humbertii J.-F.Leroy	RNF 785 (P, TEF)	Madagascar (south west)	K
C. humblotiana Baill.	BM 19/20 (K, MO, P, TAN)	Comoros Islands	BRC
C. humilis A.Chev.	G57 (K)	Ivory Coast	BRC
C. jumellei J.-F. Leroy	A.974 (P)	Madagascar (north)	KCRS
C. kapakata A.Chev.	OK (BR, BM)	Angola	BRC
C. kianjavatensis J.-F.Leroy	A.602 (K, P, TEF)	Madagascar (east)	KCRS
C. kianjavatensis J.-F.Leroy	A.213 (K, P, TEF) *	Madagascar (east)	KCRS
C. kihansiensis A.P.Davis & Mvungi	APD 2922 (K, MO)	Tanzania (high altitude)	K
C. labatii A.P.Davis & Rakotonas.	APD 3096 (K, P)	Madagascar (west)	K
C. lancifolia A.Chev. var. auriculata J.-F.Leroy	A.320 (K, P, TEF)	Madagascar (east)	KCRS
C. leroyi A.P.Davis	A.315 (K, MO, P, TAN)	Madagascar (east)	KCRS
C. liaudii A.P.Davis	A.1013 (K, P)	Madagascar (east)	KCRS
C. liberica W.Bull. var. dewevrei (De Wild. & T.Durand) Lebrun	EB51 (K)	Central African Republic	BRC
C. liberica W.Bull. var. liberica	EA64 (K)	Ivory Coast	BRC
C. lulandoensis Bridson	APD 2919 (BR, NHT, P)	Tanzania (high altitude)	K
C. macrocarpa A.Rich.	BM 6/2 (P, K)	Mascarene Islands (Mauritius)	BRC
C. mangoroensis Portères	A.401 (P, K, TEF) *	Madagascar (centre)	KCRS
C. mauritiana Lam.	BM 17/25 (P, K)	Mascarene Islands (Mauritius)	BRC
C. mauritiana Lam.	PCH-Makes4 (P, K)	Mascarene Islands (Reunion)	BRC
C. millotiiJ.-F.Leroy	A.222 (K, P, TEF)	Madagascar (east)	KCRS
C. mogenetiiDubard	A.975 (P)	Madagascar (North)	KCRS
C. montekupensisStoff.	OM 11 ( BR, K, P, YA)	Cameroon	BR
C. montis-sacriA.P.Davis	A.321 (K, TAN)	Madagascar (east)	KCRS
C. montis-sacriA.P.Davis	A.818 (K, TAN) *	Madagascar (east)	KCRS
C. moratii A.P.Davis & Rakotonas.	A.740 (K, P, MO, TAN, TEF)	Madagascar (west [riverine])	KCRS
C. mufindiensis Davis	2917 (K) *	Tanzania	K
C. mufindiensis Davis	2917 - bis (K) *	Tanzania	K
C. myrtifolia (DC.) J.-F.Leroy	MBR A9 (P, K)	Mascarene Islands (Mauritius)	BRC
C. perrieri Jum. & H.Perrier	A.12 (TEF)	Madagascar (West [riverine])	KCRS
C. pervilleana (Baill.)Drake	A.957 (TEF)	Madagascar (north)	KCRS
C. pocsii Bridson [1]	08170 (K)	Tanzania (low altitude)	BRC
C. pocsii Bridson [2]	PB58 (K)	Tanzania (low altitude)	BRC
C. pseudozanguebariae Bridson	H52 (K)	Kenya (low altitude)	BRC
C. pustulata A. P. Davis & Rakotonas. sp. nov. ined.	APD 4548 (K, TEF)	Madagascar (north)	K
C. racemosa Lour.	IB62 (K)	Mozambique	BRC
C. ratsimamangae A.P.Davis & Rakotonas.	A.528 (P, K, TEF)	Madagascar (north)	KCRS
C. resinosa (Hook.f.) Radlk.	A.8 (TEF)	Madagascar (east)	KCRS
C. rhamnifolia (Chiov.) Bridson	4908-P04003534	Somalia	P
C. richardii J.-F. Leroy	A.575 (P, TEF)	Madagascar (east)	KCRS
C. sahafaryensis J.-F. Leroy	A.978 (P, K)	Madagascar (north)	KCRS
C. sakarahae J.-F. Leroy	A.304 (P, TEF)	Madagascar (south-central)	KCRS
C. salvatrix Swynn. & Philipson	LA60 (K)	Tanzania (low altitude)	BRC
C. sambavensis A.P.Davis & Rakotonas.	A.950 (K, P, TAN, TEF) *	Madagascar (north)	KCRS
C. sp. Congo	OB60	Democratic Republic of Congo	BRC
C. sp. Fanambahy	A.904 (TAN) *	Madagascar (north)	KCRS
C. sp. Koto	EC61	Cameroon	BRC
C. sp. Ngongo2	OF62	Democratic Republic of Congo	BRC
C. sp. Ngongo3	OG70	Democratic Republic of Congo	BRC
C. sp. Nkoumbala	OI60	Cameroon	BRC
C. sp. Sambava-Diego	A.954 (TAN) *	Madagascar (north)	KCRS
C. stenophylla G.Don.	FB55 (K)	Cameroon	BRC
C. tetragona Jum. & H.Perrier	A.252 (K, MO, TAN)	Madagascar (north)	KCRS
C. toshiiA. P. Davis & Rakotonas.	A.1000 (K, BR, P, TAN)	Madagascar (east)	KCRS
C. tricalysioidesJ.-F.Leroy	APD 4503 (K, P)	Madagascar (north)	K
C. tsirananaeJ.-F.Leroy	A.515 (TEF)	Madagascar (north)	KCRS
C. vatovavyensisJ.-F.Leroy	A.830 (K, TAN)	Madagascar (north)	KCRS
C. vianneyiJ.-F.Leroy	A.946 (TEF)	Madagascar (east)	KCRS
C. vianneyiJ.-F.Leroy	A.20 (TEF) *	Madagascar (east)	KCRS
C. vohemarensis A.P.Davis & Rakotonas.	A.977 (K, P, MO, TAN)	Madagascar (north)	KCRS
Psilanthus
P. benghalensis Schult. in J.J.Roemer & J.A.Schultes (Sivar., Biju & P.Mathew) A.P.Davis var. bengalensis	BENG (P)	India (north)	CBI
P. benghalensis var. bababudanii (Sivar., Biju & P.Mathew) A.P.Davis	PBT1 (K, CALI)	India (north)	CBI
P. brassii (J.-F.Leroy) A.P.Davis	D. Crayn 1196 (CNS) *	Australia (north)	CNS
P. ebracteolatus Heirn	PSI11 (K, P)	Ivory Coast	BRC
P. horsfieldianus Miq.	HOR (K)	Indonesia	ICRI
P. leroyi Bridson	6008 *	Sudan (south)	K
P. mannii (Hook.f.) A.P.Davis	2003 1364-45 (K)	Cameroon	BR
P. melanocarus (Welw. ex Hiern) J.-F.Leroy	P00128349 *	Angola	P
P. merguensis (Ridl.) J.-F.Leroy	P04551601 *	Thailand	P
P. travancorensis Wight & Arn.	PBT2 (K)	India (South)	CBI
P. wightianus Wight & Arn.	PBT3 (K)	India (South)	CBI
Outgroups
Argocoffeopsis eketensis (Wernham) Robbr.	APD 3031 (K)	Cameroon	K
Belonophora coriacea Hoyle	OM32	Cameroon	K
Bertiera iturensis K.Krause	2008-1375-47	Gabon	K
Calycosiphonia spathicalyx (K.Schum.) Robbr.	APD 3044 (DSM, K)	Tanzania	K
Tricalysia congesta(Oliv.) Hiern	200461442-78	Zambia	K
Notes:
1. Herbarium codes after Holmgren et al. (1990).
2. Germplasm source. BR (Botanic Gardens of Belgium), BRC (Biological Resources Center, Reunion), CBI (Coffee Board of India), K (Royal Botanic Gardens, Kew (UK), KCRS (Kianjavato Coffee Research Station (Madagascar) , P (Natural History Museum , Paris (France))
